# Supplementary material for: Optimal dynamic regimens with artificial intelligence: The case of temozolomide
Source: PLoS One. 2018 Jun 26;13(6):e0199076. doi: 10.1371/journal.pone.0199076 (PMC6019254; doi:10.1371/journal.pone.0199076)
Supplement: S3 Appendix — We provide the detailed results of two other algorithm calibrations, which respectively correspond to a 0% and a 7% target population share. We also provide the complete results for protocols {P(x, 28 − x): x = 1, …, 27}. (PDF) [file pone.0199076.s003.pdf]

# Robustness check

## S3 Appendix for “Optimal dynamic regimens with artificial intelligence”

Nicolas HOUY

François LE GRAND\*

### Two other calibrations

We present here the detailed results of two other algorithm calibrations, which respectively correspond to a 0% and a 7% target population share. We will refer to these two protocols as the 0% and 7% protocols.

We represent scatter plots in S3 Fig 1 –similar to Fig 2 in the main text. Without surprise, toxicity is more concentrated around the toxicity limit for the 7% protocol, and its efficacy is slightly better than the one of the 0% protocol. Conversely, a much smaller number of patients experience a below threshold toxicity with the 0% protocol.

Finally, we plot in S3 Fig 2 the evolution over time of the efficacy and toxicity for both the MTD and H protocols. This figure is similar to Fig 3 in the main text.

Conclusions we can draw from S3 Fig 2 are consistent with what we could have expected. Overall, the better efficacy of the 7% protocol –especially in terms of dispersion– comes from an overall more severe toxicity. Furthermore, if both protocols exhibit a pseudo-cycle as the H protocol, the main difference between both protocols lie in the interim treatments occurring between major treatment blocks. They are more frequent with the 7% protocol than with the 0% one. These results confirm our findings of the main paper and illustrate that the sensitivity of our algorithm to a key parameter is consistent with intuition.

---

\*houy@gate.cnrs.fr and legrand@em-lyon.com.

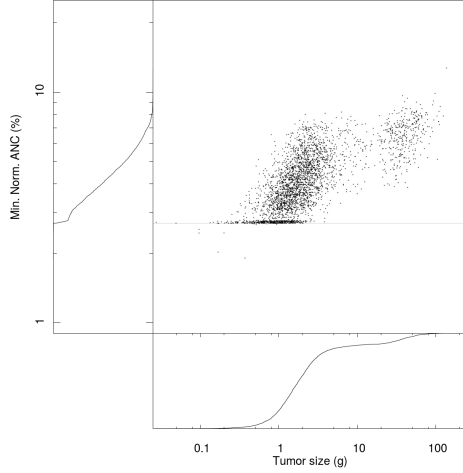

(a) 0% protocol

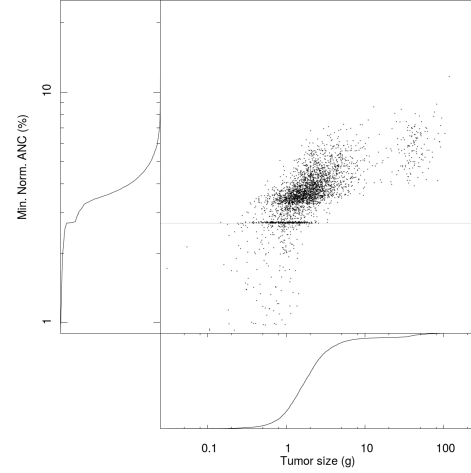

(b) 7% protocol

S3 Figure 1: Scatter plot of protocol efficacy and toxicity for 3,200 patients. Left-hand side and bottom graphs: cdf of toxicity and efficacy respectively. Light grey horizontal line in the central plot: 2.7% toxicity limit.

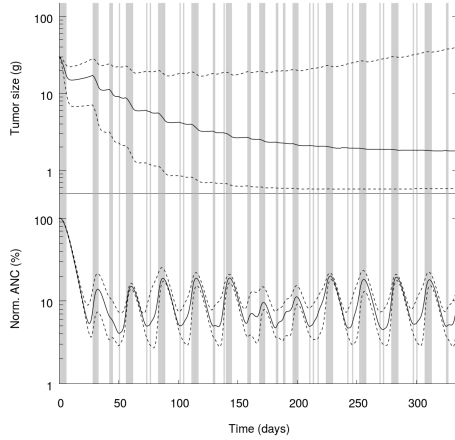

(a) 0% protocol

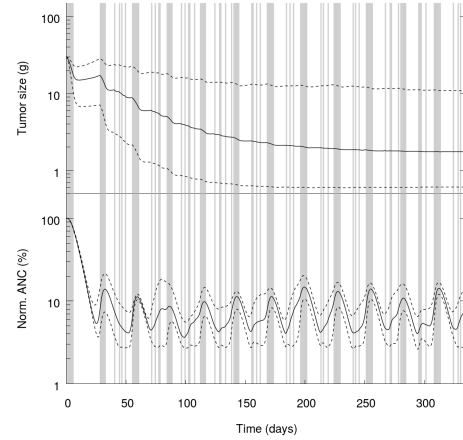

(b) 7% protocol

S3 Figure 2: Tumor size (top) and normalized ANC (bottom) as a function of time.

Grey areas: treatment periods; solid line: median; dashed lines: 5th and 95th percentiles.

**Complete results for the protocols  $\{P(x, 28 - x) : x = 1, \dots, 27\}$**

We provide here the complete results for  $\{P(x, 28 - x) : x = 1, \dots, 27\}$ .

S3 Table 1: **Comparing H protocol to the protocol family  $\{P(x, 28-x)\}$ . Median values and in square brackets, the 5th and 95th percentiles.**

| Protocol         | Tumor mass (g)                        | Norm. ANC nadir (%)                                 |
|------------------|---------------------------------------|-----------------------------------------------------|
| H protocol       | 1.80<br>[0.60,33.55]                  | 4.17<br>[2.74,6.22]                                 |
| $P(1, 27)$       | 301.83<br>[207.83,395.09]             | 42.33<br>[33.06,51.56]                              |
| $P(2, 26)$       | 180.65<br>[97.21,281.78]              | 22.68<br>[17.03,30.60]                              |
| $P(3, 25)$       | 113.104<br>[37.22,206.25]             | 14.17<br>[10.34,20.24]                              |
| $P(4, 24)$       | 67.7481<br>[1.44,153.14]              | 9.61<br>[6.69,14.43]                                |
| $P(5, 23)$ (MTD) | 32.99<br>[0.72,111.40]                | 6.74<br>[2.67,10.76]                                |
| $P(6, 22)$       | 2.76<br>[0.52,80.83]                  | 3.54<br>[0.97,8.23]                                 |
| $P(7, 21)$       | 1.56<br>[0.41,54.70]                  | 1.27<br>[0.54,6.36]                                 |
| $P(8, 20)$       | 1.26<br>[0.34,32.97]                  | 0.71<br>[0.34,3.97]                                 |
| $P(9, 19)$       | 1.11<br>[0.29,5.03]                   | 0.46<br>[0.24,1.71]                                 |
| $P(10, 18)$      | 1.02<br>[0.24,2.76]                   | 0.32<br>[0.12,0.97]                                 |
| $P(11, 17)$      | 0.96<br>[0.21,2.22]                   | 0.24<br>[0.07,0.64]                                 |
| $P(12, 16)$      | 0.91<br>[0.18,1.95]                   | 0.14<br>[0.05,0.46]                                 |
| $P(13, 15)$      | 0.88<br>[0.16,1.79]                   | 0.08<br>[0.03,0.33]                                 |
| $P(14, 14)$      | 0.85<br>[0.14,1.68]                   | 0.06<br>[0.02,0.26]                                 |
| $P(15, 13)$      | 0.83<br>[0.12,1.59]                   | 0.04<br>[0.01,0.20]                                 |
| $P(16, 12)$      | 0.81<br>[0.10,1.53]                   | 0.03<br>[ $1.53 \cdot 10^{-3}$ ,0.16]               |
| $P(17, 11)$      | 0.80<br>[0.09,1.48]                   | 0.02<br>[ $6.07e-05$ ,0.11]                         |
| $P(18, 10)$      | 0.78<br>[0.08,1.44]                   | 0.01<br>[ $4.31e-08$ ,0.08]                         |
| $P(19, 9)$       | 0.77<br>[0.06,1.41]                   | $4.71 \cdot 10^{-3}$<br>[ $3.01e-22$ ,0.05]         |
| $P(20, 8)$       | 0.76<br>[0.05,1.39]                   | $1.59 \cdot 10^{-4}$<br>[ $1.82e-28$ ,0.04]         |
| $P(21, 7)$       | 0.75<br>[0.04,1.36]                   | $2.65e-05$<br>[ $1.82e-28$ ,0.03]                   |
| $P(22, 6)$       | 0.75<br>[0.01,1.35]                   | $4.00e-08$<br>[ $1.82e-28$ ,0.02]                   |
| $P(23, 5)$       | 0.74<br>[ $2.57 \cdot 10^{-3}$ ,1.33] | $8.25e-20$<br>[ $1.82e-28$ ,0.02]                   |
| $P(24, 4)$       | 0.73<br>[ $6.32 \cdot 10^{-4}$ ,1.32] | $1.89e-28$<br>[ $1.82e-28$ ,0.01]                   |
| $P(25, 3)$       | 0.72<br>[ $2.74 \cdot 10^{-4}$ ,1.31] | $1.89e-28$<br>[ $1.82e-28$ ,0.01]                   |
| $P(26, 2)$       | 0.71<br>[ $1.98 \cdot 10^{-4}$ ,1.29] | $1.89e-28$<br>[ $1.82e-28$ , $3.53 \cdot 10^{-3}$ ] |
| $P(27, 1)$       | 0.70<br>[ $1.91 \cdot 10^{-4}$ ,1.28] | $1.89e-28$<br>[ $1.82e-28$ , $5.74 \cdot 10^{-4}$ ] |
